# Supplementary material for: Determining homologous recombination deficiency scores with whole exome sequencing and their association with responses to neoadjuvant chemotherapy in breast cancer
Source: PubMed Central journal article supplement — Transl Oncol. 2020 Dec 16;14(2):100986. doi: 10.1016/j.tranon.2020.100986 (PMC7750421; doi:10.1016/j.tranon.2020.100986), 2020-12-16
Supplement: mmc2.pdf [file mmc2.pdf]

Table S1 HRR genes analyzed by whole exome sequencing

| Gene     | Alias                   | Category | Process              |
|----------|-------------------------|----------|----------------------|
| BABAM1   | NBA1, Merit40           | core     | HR                   |
| BARD1    |                         | core     | HR                   |
| BLM      |                         | core     | HR                   |
| BRCA1    |                         | core     | HR                   |
| BRCA2    | FANCD1                  | core     | HR, FA               |
| BRCC3    | BRCC36                  | core     | HR, Deubiquitylation |
| BRIP1    | FANCI, BACH1            | core     | HR, FA               |
| EME1     | MMS4L                   | core     | HR                   |
| EME2     |                         | core     | HR                   |
| EXO1     |                         | core     | HR                   |
| ABRAXAS1 | AbraXas, ABRA1, FAM175A | core     | HR                   |
| GEN1     |                         | core     | HR                   |
| H2AFX    | H2AX                    | core     | DSB Signaling        |
| MDC1     |                         | core     | DSB Signaling        |
| MRE11    | MRE11A                  | core     | DSB Signaling, HR    |
| MUS81    |                         | core     | HR                   |
| NBN      | NBS                     | core     | DSB Signaling, HR    |
| PALB2    | FANCD1                  | core     | HR, FA               |
| RAD50    |                         | core     | DSB Signaling, HR    |
| RAD51    |                         | core     | HR                   |
| RAD51AP1 |                         | core     | HR                   |
| RAD51B   | RAD51L1                 | core     | HR                   |
| RAD51C   | FANCD1, RAD51L2         | core     | HR, FA               |
| RAD51D   | RAD51L3                 | core     | HR                   |
| RAD52    |                         | core     | HR                   |
| RAD54B   |                         | core     | HR                   |
| RAD54L   |                         | core     | HR                   |
| RBBP8    | CTIP                    | core     | HR                   |
| REV1     | REV1L                   | core     | HR                   |
| RPA1     |                         | core     | HR, NER              |
| RPA2     |                         | core     | HR, NER              |
| RTEL1    |                         | core     | HR                   |
| SEM1     | DSS1; SHFM1             | core     | HR                   |
| SLX1A    | SLX1; GIYD1             | core     | HR                   |
| SLX1B    | GIYD2                   | core     | HR                   |
| SLX4     | FANCD1                  | core     | HR, FA               |
| TP53BP1  | 53BP1                   | core     | DSB Signaling        |
| UIMC1    | RAP80                   | core     | HR                   |
| XRCC2    |                         | core     | HR                   |
| XRCC3    |                         | core     | HR                   |
| ABL1     |                         | related  | DDR                  |
| ATM      |                         | related  | DSB Signaling        |
| ATR      |                         | related  | DSB Signaling        |
| ATRIP    |                         | related  | DDR                  |

|         |            |         |                        |
|---------|------------|---------|------------------------|
| BAP1    |            | related | DDR                    |
| BRE     | BRCC4      | related | DDR                    |
| FAAP100 | C17orf70   | related | FA                     |
| FAAP24  | C19orf40   | related | HR, FA                 |
| FAAP20  | C1orf86    | related | FA                     |
| CDK12   |            | related | DDR                    |
| CHEK1   |            | related | DSB Signaling          |
| CHEK2   |            | related | DSB Signaling          |
| DMC1    |            | related | HR                     |
| DNA2    |            | related | HR                     |
| DNMT3A  |            | related |                        |
| ERCC4   | XPF, FANCO | related | FA, SSA, NER           |
| FAN1    | MTMR15     | related | FA                     |
| FANCA   |            | related | FA                     |
| FANCB   |            | related | FA                     |
| FANCC   |            | related | FA                     |
| FANCD2  |            | related | FA                     |
| FANCE   |            | related | FA                     |
| FANCF   |            | related | FA                     |
| FANCG   | XRCC9      | related | FA                     |
| FANCI   | KIAA1794   | related | FA                     |
| FANCL   |            | related | FA                     |
| FANCM   |            | related | FA                     |
| FEN1    |            | related | DDR                    |
| FIGNL1  |            | related | HR                     |
| HELQ    |            | related | HR                     |
| KAT5    | tip60      | related | chromatin: HAT         |
| NONO    | NRB54; p54 | related | HR                     |
| PARP1   | ADPRT      | related | SSBR                   |
| PIAS1   |            | related | chromatin: sumoylation |
| PIAS4   |            | related | chromatin: sumoylation |
| POLN    | POLP4      | related | Polymerase             |
| POLQ    |            | related | Polymerase             |
| RAD1    |            | related | DDR                    |
| RAD17   | RAD24      | related | DDR                    |
| RAD9A   |            | related | DDR                    |
| RECQL   | RECQ1      | related | DDR                    |
| RECQL4  |            | related | DDR                    |
| RIF1    |            | related | HR                     |
| RMI1    |            | related | HR                     |
| RMI2    |            | related | HR                     |
| RNF168  |            | related | DSB Signaling          |
| RNF169  |            | related | DSB Signaling          |
| RNF4    |            | related | Ubiquitination         |
| RPA3    |            | related | NER                    |
| SETMAR  | Metnase    | related |                        |
| SFPQ    | PSF        | related |                        |

|          |          |         |                    |
|----------|----------|---------|--------------------|
| SFR1     |          | related | HR                 |
| SMC1A    | SMC1     | related | cohesin            |
| SMC3     |          | related | cohesin            |
| SMC5     |          | related | cohesin            |
| SPDR     | KIAA0146 | related | HR                 |
| TIMELESS |          | related |                    |
| TIPIN    |          | related | DDR                |
| TOPBP1   |          | related | DDR                |
| USP1     |          | related | FA                 |
| USP11    |          | related | HR, ubiquitination |
| WRN      |          | related | DDR                |

FA: Fanconi Anemia; DSB Signaling: Double-strand break signaling; DDR: DNA Damage Response;  
NER: nucleotide excision repair; SSBR: single-strand break repair

Table S2 Germline HRR gene mutations

| ID         | Chr   | Start    | End      | Ref   | Alt | Gene   | Variant type         | CLNSIG     | Serum |       | Tumor |       |     |     |
|------------|-------|----------|----------|-------|-----|--------|----------------------|------------|-------|-------|-------|-------|-----|-----|
|            |       |          |          |       |     |        |                      |            | AD    | AF    | AD    | AF    | HRD | LOH |
| Patient1   | chr17 | 43099817 | 43099817 | G     | A   | BRCA1  | stopgain             | Pathogenic | 41,51 | 0.554 | 31,66 | 0.680 | 83  | +   |
| Patient2   | chr17 | 43063369 | 43063370 | CA    | -   | BRCA1  | frameshift deletion  | Pathogenic | 14,9  | 0.391 | 13,11 | 0.458 | 85  | +   |
| Patient3   | chr13 | 32379885 | 32379885 | -     | A   | BRCA2  | frameshift insertion | Pathogenic | 10,34 | 0.773 | 19,67 | 0.779 | 75  | +   |
| Patient4   | chr13 | 32339764 | 32339765 | TG    | -   | BRCA2  | frameshift deletion  | Pathogenic | 17,26 | 0.605 | 18,38 | 0.679 | 49  | +   |
| Patient5   | chr13 | 32331004 | 32331008 | CAAAT | -   | BRCA2  | frameshift deletion  | Pathogenic | 8,4   | 0.333 | 5,6   | 0.545 | 62  | +   |
| Patient5   | chr8  | 94399540 | 94399540 | C     | A   | RAD54B | nonsynonymous SNV    | Pathogenic | 26,24 | 0.480 | 71,69 | 0.493 | 62  | -   |
| Patient6   | chr13 | 32339929 | 32339932 | AAT   | -   | BRCA2  | frameshift deletion  | Pathogenic | 21,26 | 0.553 | 17,56 | 0.767 | 67  | +   |
| Patient7   | chr13 | 32346841 | 32346841 | C     | T   | BRCA2  | stopgain             | Pathogenic | 12,3  | 0.200 | 12,19 | 0.613 | 47  | +   |
| Patient8   | chr13 | 32346841 | 32346841 | C     | T   | BRCA2  | stopgain             | Pathogenic | 15,18 | 0.545 | 7,9   | 0.563 | 51  | +   |
| Patient9   | chr13 | 32346841 | 32346841 | C     | T   | BRCA2  | stopgain             | Pathogenic | 14,17 | 0.548 | 23,4  | 0.148 | 29  | +   |
| Patient100 | chr13 | 32333284 | 32333284 | A     | -   | BRCA2  | frameshift deletion  | Pathogenic | 7,10  | 0.588 | 20,20 | 0.500 | 28  | -   |
| Patient11  | chr16 | 23621408 | 23621408 | G     | A   | PALB2  | stopgain             | Pathogenic | 17,26 | 0.605 | 47,51 | 0.520 | 39  | +   |
| Patient12  | chr8  | 94399540 | 94399540 | C     | A   | RAD54B | nonsynonymous SNV    | Pathogenic | 38,21 | 0.356 | 32,45 | 0.584 | 26  | +   |

CLNSIG, clinical significance; AD, allele depth; AF, allele frequency; DP, Depth; GQ, Quality of the assigned genotype

Table S3: Somatic HRR gene mutations

| ID        | Chr   | Start     | End       | Ref                    | Alt | Gene    | Variant type           | CLNSIG | AD      | AF    | HRD | LOH |
|-----------|-------|-----------|-----------|------------------------|-----|---------|------------------------|--------|---------|-------|-----|-----|
| Patient13 | chr11 | 108321293 | 108321302 | GCTACTAGAG             | -   | ATM     | frameshift deletion    |        | 59,9    | 0.130 | 3   | -   |
| Patient14 | chr11 | 108316019 | 108316019 |                        | C T | ATM     | nonsynonymous SNV      |        | 81,6    | 0.078 | 12  | -   |
| Patient15 | chr11 | 108251029 | 108251029 |                        | G C | ATM     | nonsynonymous SNV      |        | 41,22   | 0.354 | 39  | +   |
| Patient16 | chr3  | 142469454 | 142469454 |                        | C G | ATR     | nonsynonymous SNV      |        | 23,8    | 0.273 | 59  | +   |
| Patient16 | chr17 | 61683819  | 61683819  |                        | G A | BRIP1   | nonsynonymous SNV      | US     | 77,11   | 0.133 | 59  | +   |
| Patient16 | chr17 | 81551048  | 81551048  |                        | C T | FAAP100 | nonsynonymous SNV      |        | 407,156 | 0.278 | 59  | +   |
| Patient16 | chrX  | 14850589  | 14850589  |                        | G C | FANCB   | stopgain               |        | 49,16   | 0.254 | 59  | -   |
| Patient16 | chr8  | 144515821 | 144515821 |                        | C G | RECQL4  | nonsynonymous SNV      |        | 160,63  | 0.284 | 59  | -   |
| Patient16 | chr3  | 133608923 | 133608923 |                        | G A | TOPBP1  | stopgain               |        | 45,14   | 0.246 | 59  | -   |
| Patient17 | chr3  | 142493248 | 142493248 |                        | C A | ATR     | stopgain               |        | 57,6    | 0.107 | 50  | -   |
| Patient18 | chr3  | 48447042  | 48447042  |                        | T A | ATRIP   | nonsynonymous SNV      |        | 67,8    | 0.117 | 77  | +   |
| Patient19 | chr17 | 43093458  | 43093458  |                        | T A | BRCA1   | nonsynonymous SNV      |        | 77,22   | 0.228 | 22  | +   |
| Patient20 | chr17 | 39462456  | 39462456  |                        | G A | CDK12   | nonsynonymous SNV      |        | 75,7    | 0.089 | 5   | +   |
| Patient20 | chr9  | 35079468  | 35079468  |                        | C G | FANCG   | nonsynonymous SNV      |        | 215,21  | 0.092 | 5   | -   |
| Patient20 | chr3  | 4313693   | 4313693   |                        | G C | SETMAR  | nonsynonymous SNV      |        | 135,13  | 0.093 | 5   | -   |
| Patient21 | chr22 | 28734714  | 28734714  |                        | C A | CHEK2   | nonsynonymous SNV      | US     | 89,6    | 0.072 | 30  | -   |
| Patient21 | chr1  | 35192490  | 35192490  |                        | G T | SFPQ    | nonsynonymous SNV      |        | 46,5    | 0.101 | 30  | +   |
| Patient22 | chr16 | 13948099  | 13948116  | TCTGAAACCC<br>TTCCCGAG | -   | ERCC4   | nonframeshift deletion |        | 143,11  | 0.077 | 15  | -   |
| Patient23 | chr1  | 241866872 | 241866872 |                        | C T | EXO1    | stopgain               |        | 98,7    | 0.074 | 17  | -   |
| Patient24 | chr9  | 35075493  | 35075502  | GGGCACCCAG             | -   | FANCG   | frameshift deletion    |        | 285,17  | 0.059 | 16  | -   |
| Patient25 | chr14 | 45167019  | 45167019  |                        | C A | FANCM   | nonsynonymous SNV      |        | 33,6    | 0.170 | 36  | -   |
| Patient25 | chr8  | 144512230 | 144512230 |                        | C G | RECQL4  | nonsynonymous SNV      |        | 302,31  | 0.095 | 36  | -   |
| Patient25 | chr2  | 151463251 | 151463251 |                        | C T | RIF1    | nonsynonymous SNV      |        | 59,8    | 0.130 | 36  | -   |
| Patient25 | chrX  | 47247887  | 47247887  |                        | C T | USP11   | nonsynonymous SNV      |        | 58,27   | 0.322 | 36  | -   |
| Patient26 | chr11 | 65860989  | 65860989  |                        | G C | MUS81   | nonsynonymous SNV      |        | 187,12  | 0.065 | 2   | -   |
| Patient27 | chr11 | 65860885  | 65860885  |                        | G C | MUS81   | nonsynonymous SNV      |        | 157,18  | 0.107 | 44  | +   |
| Patient27 | chr5  | 132640744 | 132640744 |                        | G C | RAD50   | nonsynonymous SNV      |        | 90,9    | 0.099 | 44  | +   |
| Patient28 | chrX  | 71291848  | 71291848  |                        | G A | NONO    | nonsynonymous SNV      |        | 61,8    | 0.127 | 37  | -   |
| Patient29 | chr16 | 23636244  | 23636244  |                        | T C | PALB2   | nonsynonymous SNV      |        | 106,20  | 0.164 | 32  | -   |

|           |       |           |           |            |   |         |                        |    |        |       |    |   |
|-----------|-------|-----------|-----------|------------|---|---------|------------------------|----|--------|-------|----|---|
| Patient30 | chr3  | 121440114 | 121440114 | T          | C | POLQ    | nonsynonymous SNV      |    | 26,6   | 0.205 | 11 | - |
| Patient31 | chr3  | 121487393 | 121487402 | GCACCGCCAC | - | POLQ    | frameshift deletion    |    | 87,7   | 0.083 | 29 | - |
| Patient32 | chr14 | 67865080  | 67865080  | G          | A | RAD51B  | nonsynonymous SNV      |    | 54,9   | 0.153 | 32 | - |
| Patient33 | chr8  | 144511946 | 144511946 | C          | T | RECQL4  | nonsynonymous SNV      | US | 191,51 | 0.209 | 22 | - |
| Patient33 | chrX  | 53405309  | 53405309  | C          | T | SMC1A   | nonsynonymous SNV      |    | 175,59 | 0.254 | 22 | - |
| Patient34 | chr8  | 144517455 | 144517455 | C          | T | RECQL4  | nonsynonymous SNV      |    | 153,13 | 0.083 | 58 | - |
| Patient35 | chr8  | 144514071 | 144514071 | C          | A | RECQL4  | nonsynonymous SNV      |    | 216,36 | 0.146 | 15 | - |
| Patient36 | chr16 | 3597489   | 3597489   | G          | A | SLX4    | unknown                |    | 86,17  | 0.171 | 44 | - |
| Patient37 | chr3  | 133656762 | 133656770 | GCTACCAAC  | - | TOPBP1  | nonframeshift deletion |    | 113,6  | 0.053 | 5  | - |
| Patient38 | chr15 | 43477599  | 43477599  | T          | C | TP53BP1 | nonsynonymous SNV      |    | 61,15  | 0.206 | 34 | - |
| Patient39 | chr8  | 31067090  | 31067090  | C          | G | WRN     | nonsynonymous SNV      |    | 59,5   | 0.090 | 12 | - |

CLNSIG, clinical significance; AD, allele depth; AF, allele frequency; DP, Depth; AMBQ, median base quality of alternate alleles; US, Uncertain significance
